# Supplementary material for: Korean Guidelines for Postpolypectomy Colonoscopy Surveillance
Source: PubMed Central journal article supplement — Clin Endosc. 2012 Mar 31;45(1):44–61. doi: 10.5946/ce.2012.45.1.44 (PMC3363120; doi:10.5946/ce.2012.45.1.44), 2012-03-31
Supplement: ce-45-44-s001.pdf [file ce-45-44-s001.pdf]

**Supplementary Table 1. Study Characteristics**

| Author, yr                                                                            | Country       | Design                                             | Sample size, No. | Age, yr                    | Male gender, % | Inclusion criteria                                                                                   | Exclusion criteria                                                                                                                   | Colonoscopy follow-up                                    | Endpoint definition of advanced neoplasia                                                                                                       | Conclusion                                                                                                                                                                                  |
|---------------------------------------------------------------------------------------|---------------|----------------------------------------------------|------------------|----------------------------|----------------|------------------------------------------------------------------------------------------------------|--------------------------------------------------------------------------------------------------------------------------------------|----------------------------------------------------------|-------------------------------------------------------------------------------------------------------------------------------------------------|---------------------------------------------------------------------------------------------------------------------------------------------------------------------------------------------|
| Winawer et al., <sup>6</sup> 1993<br>National Polyp Study                             | USA           | Multi-center, RCT for timing of surveillance       | 1,418            | 61.2±10.2 <sup>a)</sup>    | 70             | First diagnosis of adenoma; complete clearing colonoscopy; no family or personal history of FAP, IBD | CRC or malignant polyps (invading beyond the muscularis mucosa); sessile adenoma with a base > 3 cm; non-neoplastic polyp; no polyps | At 1+3 yr vs. at 3 yr                                    | Advanced colorectal neoplasia: adenoma >1 cm, high grade dysplasia, or CRC                                                                      | After colonoscopy with removal of all polyps, colorectal examination at 4 yr resulted in a similar risk of new adenomas and significant neoplasia compared with examinations at 2 and 4 yr. |
| Jorgensen et al., <sup>9</sup> 1995<br>Funen Adenoma Follow-up Study                  | Denmark       | Single center, RCT for timing of surveillance      | 673              | 28-77 <sup>b)</sup>        | 56.8           | Newly diagnosed pedunculated adenomas and small sessile tubular or tubulovillous adenomas            | CRC; history of colorectal neoplasia; FAP                                                                                            | Every 2 yr vs. every 4 yr                                | Significant neoplasia: CRC or adenoma with villous structure, severe dysplasia, or a diameter >10 mm                                            | Colonoscopy performed 3 yr after colonoscopic removal of adenomatous polyps detects important colonic lesions as effectively as follow-up colonoscopy after both 1 and 3 yr.                |
| van Stolk et al., <sup>50</sup> 1998<br>Antioxidant Polyp Prevention Trial            | USA           | Multi-center, analysis of chemoprevention RCT data | 479              | 60 (25-78) <sup>c)</sup>   | 77             | First diagnosis of adenoma within 3 mo of enrollment; <80 yr; in good health                         | CRC; FAP; malabsorption syndromes; any condition potentially worsened by vitamins C or E                                             | At 1 (clearing colonoscopy) +4 yr                        | Clinically important adenoma: adenoma ≥1 cm, villous, or severe dysplasia                                                                       | Patients with 1 or 2 tubular adenomas constitute a low-risk group for whom follow-up might be extended beyond 3 yr.                                                                         |
| Noshirvani et al., <sup>31</sup> 2000<br>Cleveland Clinic Foundation Adenoma Registry | USA           | Single-center, prospective cohort study            | 697              | NA                         | 73.3           | Patients with adenoma removal; surveillance colonoscopy within 10-42 mo                              | CRC; UC; FAP                                                                                                                         | 10-42 mo (mean, 18 mo)                                   | Significant outcome 1: tubulovillous adenoma, villous adenoma, high grade dysplasia/carcinoma <i>in situ</i> , invasive cancer or size of ≥1 cm | Patients with 1 or 2 adenomas all measuring less than 1 cm are an identified low risk group and their first surveillance examination may be delayed beyond the standard 3 yr.               |
| Martinez et al., <sup>51</sup> 2001<br>Wheat bran fiber trial                         | USA (Arizona) | Multi-center, analysis of chemoprevention RCT data | 1,287            | 66.2 (40-80) <sup>d)</sup> | 66.8           | Patients with adenomas (≥3 mm); 40-80 yr                                                             | IBD; hereditary colon cancer syndromes                                                                                               | At 1 (clearing colonoscopy) +3 yr                        | Advanced lesion: adenoma ≥10 mm, tubulovillous/villous histology, or all colon cancers                                                          | Large or proximally located adenomas are important indicators of recurrence of advanced lesions.                                                                                            |
| Nusko et al., <sup>32</sup> 2002<br>Erlangen Registry of Colorectal Polyps            | German        | Prospective cohort study                           | 1,159            | NA                         | NA             | First diagnosis of adenoma                                                                           | CRC; family history of FAP, HNPCC, IBD                                                                                               | Single adenoma: every 4 yr/multiple adenomas: every 2 yr | Adenoma of advanced pathology: >10 mm in size, with high grade dysplasia, or invasive carcinoma                                                 | Surveillance intervals can be scheduled for low risk (10 yr) and high risk (3 yr) patients.                                                                                                 |

**Supplementary Table 1. Continued**

| Author, yr                               | Country | Design                                             | Sample size, No. | Age, yr                                                                              | Male gender, % | Inclusion criteria                                                                                                                         | Exclusion criteria                                                                                                          | Colonoscopy follow-up                                                             | Endpoint definition of advanced neoplasia                                                          | Conclusion                                                                                                                                                                                                                                                |
|------------------------------------------|---------|----------------------------------------------------|------------------|--------------------------------------------------------------------------------------|----------------|--------------------------------------------------------------------------------------------------------------------------------------------|-----------------------------------------------------------------------------------------------------------------------------|-----------------------------------------------------------------------------------|----------------------------------------------------------------------------------------------------|-----------------------------------------------------------------------------------------------------------------------------------------------------------------------------------------------------------------------------------------------------------|
| Bertario et al., <sup>10</sup> 2003      | Italy   | Single-center, prospective cohort study            | 1,086            | 61 (24-87) <sup>(c)</sup>                                                            | 55             | Patients were referred for colonoscopies because of either positive FOBT or family history of CRC                                          | History of adenoma or CRC; non-neoplastic polyps; history or suspected pt with possible genetic syndrome                    | At 1 yr → if negative: every 3 yr if negative.                                    | Advanced metachronous features: CRC or severe dysplasia                                            | Endoscopic polypectomy is able to reduce by 50% the incidence of CRC in patients with large bowel adenomas.                                                                                                                                               |
| Bonithon-Kopp et al., <sup>49</sup> 2004 | Europe  | Multi-center, analysis of chemoprevention RCT data | 552              | 58.8±8.8 for calcium group<br>59.1±8.9 for fiber group<br>59.3±8.4 for placebo group | NA             | ≥2 adenomas or a single adenoma >5 mm in diameter; complete index colonoscopy; 35-75 yr; no debilitating or life threatening disease       | CRC; FAP; IBD; colonic resection; contraindications to calcium or fiber; current calcium treatment or fiber supplementation | At 3 yr                                                                           | Advanced adenoma: adenoma ≥10 mm, moderate/severe dysplasia, or tubulovillous/villous adenoma      | Follow-up colonoscopies in patients with adenomas should include careful examination of the proximal colon. The time interval between follow-up examinations could probably be extended beyond 3 yr in patients who have only one or two distal adenomas. |
| Kim et al., <sup>33</sup> 2004           | Korea   | Single-center, retrospective cohort study          | 97               | NA                                                                                   | 72.2           | Patients with adenoma                                                                                                                      | CRC; non-neoplastic polyp; incomplete colonoscopy; colonic resection                                                        | At least 6 mo later after polypectomy                                             | Advanced polyp: polyp ≥10 mm, adenoma with severe dysplasia, or villous adenoma                    | Recurrence of advanced polyp is very rare within one year after polypectomy. Patients with single polyp have low risk and thus, their surveillance may be delayed beyond the standard 3 yr.                                                               |
| Yamaji et al., <sup>87</sup> 2004        | Japan   | Multi-center, prospective cohort study             | 6,225            | 48.1±9.4 <sup>(d)</sup>                                                              | 74.8           | Annual medical health checkup subject who underwent ≥ 3 annual colonoscopies                                                               | CRC; history of CRC; polyps; IBD                                                                                            | Every 1 yr                                                                        | Advanced adenoma: carcinoma <i>in situ</i> , or adenoma with severe dysplasia, and adenomas ≥10 mm | Although recurrence rates after polypectomy were elevated, the incidence rates in subjects with no neoplastic lesions initially were quite high.                                                                                                          |
| Lieberman et al., <sup>52</sup> 2007     | USA     | Multi-center, prospective cohort study             | 895              | 62.9 (50-75) <sup>(b)</sup>                                                          | 96.8           | 50-75 yr; no lower gastrointestinal tract symptoms; no prior history of colon disease; no structural examination of the colon within 10 yr | Declined to participate; incomplete colonoscopy                                                                             | Within 5.5 yr (most patients with advanced neoplasia had colonoscopy within 3 yr) | Advanced neoplasia: adenoma ≥10 mm, villous adenoma, high-grade dysplasia or invasive cancer       | Patients with 1 or 2 tubular adenomas less than 10 mm represent a low-risk group compared with other patients with colon neoplasia.                                                                                                                       |

**Supplementary Table 1. Continued**

| Author, yr                                                                                       | Country       | Design                                                                | Sample size, No. | Age, yr                    | Male gender, % | Inclusion criteria                                                                                                                                                                                                                                                                                                                          | Exclusion criteria                                                                                                         | Colonoscopy follow-up                             | Endpoint definition of advanced neoplasia                                                          | Conclusion                                                                                                                                                                                                                                   |
|--------------------------------------------------------------------------------------------------|---------------|-----------------------------------------------------------------------|------------------|----------------------------|----------------|---------------------------------------------------------------------------------------------------------------------------------------------------------------------------------------------------------------------------------------------------------------------------------------------------------------------------------------------|----------------------------------------------------------------------------------------------------------------------------|---------------------------------------------------|----------------------------------------------------------------------------------------------------|----------------------------------------------------------------------------------------------------------------------------------------------------------------------------------------------------------------------------------------------|
| Laiyemo et al., <sup>53</sup><br>2008<br>Polyp Prevention Trial                                  | USA           | Multi-center, analysis of chemoprevention RCT data                    | 1,905            | 61 <sup>a)</sup>           | 64.5           | Patients with adenoma removal within 6 mo of randomization; ≥35 yr                                                                                                                                                                                                                                                                          | CRC; surgical adenoma resection; FAP; IBD; bowel resection; obesity; taking lipid-lowering medication; dietary restriction | At 1 (clearing colonoscopy)+4 yr                  | Advanced adenoma: adenoma ≥10 mm, villous/tubulovillous adenoma, or high-grade dysplasia           | Although the risk for recurrence of advanced adenoma within 4 yr is greater for patients with high-risk adenomas at baseline than for those with low-risk adenomas, the discrimination of this risk stratification scheme is relatively low. |
| Laiyemo et al., <sup>86</sup><br>2009<br>Continued follow-up Study of the Polyp Prevention Trial | USA           | Multi-center, prospective cohort study                                | 774              | 65.3±9.6 <sup>b)</sup>     | 67             | Among participant in Polyp Prevention Trial, patients had a willingness to participate                                                                                                                                                                                                                                                      | NA                                                                                                                         | Usual care of primary physicians and endoscopists | Advanced adenoma: adenoma ≥10 mm, villous/tubulovillous adenoma, or high-grade dysplasia           | Surveillance colonoscopy was overused for low-risk subjects and underused for high-risk subjects.                                                                                                                                            |
| Martinez et al., <sup>30</sup><br>2009                                                           | North America | Pooled analyses used patient-level data from 8 North American studies | 9,167            | 62.0 (22-80) <sup>b)</sup> | 71             | Included studies<br>1) ≥800 study participants;<br>2) complete baseline colonoscopy with removal of ≥1 adenomas and all visualized lesions;<br>3) specified schedule of surveillance follow-up colonoscopies;<br>4) available endpoint data regarding the number, size, and histopathology of adenomas and CRCs detected in follow-up exam. | CRC; no follow-up colonoscopy after the first 6 mo of study                                                                | 1-5 yr                                            | Advanced neoplasia: adenoma ≥10 mm, high grade dysplasia, >25% villous features or invasive cancer | Occurrence of advanced colorectal neoplasia is common after polypectomy. Factors that are associated most strongly with risk of advanced neoplasia are patient age and the number and size of prior adenomas.                                |

**Supplementary Table 1. Continued**

| Author, yr                           | Country | Design                                                                    | Sample size, No. | Age, yr                       | Male gender, % | Inclusion criteria                                                                                                              | Exclusion criteria                                                                                                                                                                                                               | Colonoscopy follow-up                                                                                                                          | Endpoint definition of advanced neoplasia                                                                                                                                                            | Conclusion                                                                                                                                                                                                          |
|--------------------------------------|---------|---------------------------------------------------------------------------|------------------|-------------------------------|----------------|---------------------------------------------------------------------------------------------------------------------------------|----------------------------------------------------------------------------------------------------------------------------------------------------------------------------------------------------------------------------------|------------------------------------------------------------------------------------------------------------------------------------------------|------------------------------------------------------------------------------------------------------------------------------------------------------------------------------------------------------|---------------------------------------------------------------------------------------------------------------------------------------------------------------------------------------------------------------------|
| Pinsky et al., <sup>34</sup><br>2009 | USA     | Multi-center, prospective cohort study (study of colonoscopy utilization) | 2,607            | 63 <sup>a)</sup>              | 60             | Screening-arm PLCO subjects had a positive baseline sigmoidoscopy screen with a follow-up colonoscopy within 18 months; no CRC  | Subjects whose first post-baseline colonoscopy was performed as a result of having a positive yr 3 or yr 5 PLCO FSG screen                                                                                                       | 6 mo-10 yr                                                                                                                                     | Advanced adenoma: an adenoma $\geq$ 10 mm, villous or tubulovillous, or severe dysplasia                                                                                                             | Subjects with baseline advanced adenomas are more likely to have recurrent advanced adenomas at initial surveillance.                                                                                               |
| Huang et al., <sup>35</sup><br>2010  | China   | Single-center, retrospective cohort study                                 | 1,356            | 52.4 $\pm$ 12.5 <sup>a)</sup> | 63.6           | >20 yr; complete colonoscopy; clearing colonoscopy within 6 mo after the initial colonoscopy to remove missed adenomas          | History of CRC; FAP; IBD                                                                                                                                                                                                         | Within 6 mo (clearing colonoscopy) +1-20 yr                                                                                                    | Advanced adenoma: villous/tubulovillous adenoma, or high-grade dysplasia                                                                                                                             | 3-yr follow-up of patients after polypectomy could be effective in preventing the recurrence of advanced adenoma in high-risk patients.                                                                             |
| Chung et al., <sup>36</sup><br>2011  | Korea   | Single-center, prospective cohort study                                   | 3,803            | 52.7 $\pm$ 9.6 <sup>a)</sup>  | 63.5           | First screening colonoscopy; asymptomatic volunteers aged 50-69; complete clearing colonoscopy; $\geq$ 1 follow-ups within 5 yr | History of CRC or poly; colorectal disease-related symptoms or signs; surgical resection of the colon; IBD or intestinal tuberculosis; coagulopathy; incomplete colonoscopy d/t inadequate preparation or technical difficulties | Normal group: at 5 yr/low-risk group (1 or 2 adenomas <10 mm); <3+5 yr or at 5 yr/high risk group (adv. adenoma or $\geq$ 3 adenomas); <3+5 yr | Advanced adenoma: $\geq$ 10 mm in diameter, containing >25% villous structure or high-grade dysplasia (intramucosal carcinoma or carcinoma <i>in situ</i> was categorized as a high-grade dysplasia) | The surveillance interval for low-risk patients could be extended beyond 5 yr. Colonoscopic surveillance should be targeted to high-risk patients, and 3-yr follow-up after initial polypectomy may be appropriate. |

RCT, randomized controlled trial; FAP, familial adenomatous polyposis; IBD, inflammatory bowel disease; CRC, colorectal cancer; NA, not available; UC, ulcerative colitis; HNPCC, hereditary non-polyposis colorectal cancer; FOBT, fecal occult blood test; PLCO, Prostate, Lung, Colorectal, and Ovarian Cancer Screening trial; FSG, flexible sigmoidoscopy.  
<sup>a)</sup>Values are presented as mean $\pm$ SD; <sup>b)</sup>Range only; <sup>c)</sup>Median and range.

**Supplementary Table 2.** The Number of Colorectal Adenomas as a Risk Factor of Advanced Neoplasia

| Study, yr                                                                             | Country       | No. of adenoma at index colonoscopy | Enrolled total patients, No. | Patients with metachronous advanced neoplasia, No. (%) | Adjusted OR/RR (95% CI) |
|---------------------------------------------------------------------------------------|---------------|-------------------------------------|------------------------------|--------------------------------------------------------|-------------------------|
| Jorgensen et al., <sup>9</sup> 1995                                                   | Denmark       | 1                                   |                              |                                                        | 1                       |
|                                                                                       |               | 2                                   |                              |                                                        | 1.3 (0.6-3.0)           |
|                                                                                       |               | ≥3                                  |                              |                                                        | 3.0 (1.2-7.1)           |
| Noshirwani et al., <sup>31</sup> 2000                                                 | USA           | Per 1 increase                      | 697                          | 63 (9)                                                 | 1.25 (1.13-1.38)        |
| Nusko et al., <sup>32</sup> 2002                                                      | Germany       | 1                                   |                              |                                                        | 1                       |
|                                                                                       |               | ≥2                                  |                              |                                                        | 1.54 (1.12-2.12)        |
| Bonithon-Kopp et al., <sup>49</sup> 2004                                              | Europe        | 1                                   | 360                          | 18 (5)                                                 | 1                       |
|                                                                                       |               | 2                                   | 109                          | 8 (7.3)                                                | 1.4 (0.59-3.51)         |
|                                                                                       |               | ≥3                                  | 83                           | 15 (18.1)                                              | 3.6 (1.64-7.89)         |
| Kim et al., <sup>33</sup> 2004                                                        | Korea         | 1                                   |                              |                                                        | 0.24 (0.08-0.73)        |
|                                                                                       |               | ≥2                                  |                              |                                                        | 1                       |
| Martinez et al., <sup>30</sup> 2009                                                   | North America | 1                                   | 5,465                        | 497 (9.1)                                              | 1                       |
|                                                                                       |               | 2                                   | 2,054                        | 271 (13.2)                                             | 1.39 (1.17-1.66)        |
|                                                                                       |               | 3                                   | 890                          | 146 (16.4)                                             | 1.85 (1.46-2.34)        |
|                                                                                       |               | 4                                   | 326                          | 68 (20.9)                                              | 2.41 (1.71-3.40)        |
|                                                                                       |               | ≥5                                  | 377                          | 94 (24.9)                                              | 3.87 (2.76-5.42)        |
| Pinsky et al., <sup>34</sup> 2009                                                     | USA           | 1-2 small TA                        | 650                          | 42 (6.5)                                               | 1                       |
|                                                                                       |               | ≥3 small TA                         | 153                          | 16 (10.5)                                              | 1.5 (0.8-2.6)           |
| Below studies were included in pooled analysis (Martinez et al., <sup>30</sup> 2009). |               |                                     |                              |                                                        |                         |
| Winawer et al., 1993                                                                  | USA           | 1                                   | 541                          | 6 (1.1)                                                | 1                       |
|                                                                                       |               | 2                                   | 200                          | 4 (2)                                                  | 1.5 (0.4-5.6)           |
|                                                                                       |               | ≥3                                  | 197                          | 18 (9.1)                                               | 6.9 (2.6-18.3)          |
| van Stolk et al., <sup>50</sup> 1998                                                  | USA           | 1 or 2                              | 393                          | 13 (3.3)                                               | 1                       |
|                                                                                       |               | ≥3                                  | 84                           | 5 (6)                                                  | 1.13 (0.40-3.18)        |
| Martinez et al., <sup>51</sup> 2001                                                   | USA (Arizona) | 1                                   | 742                          | 86 (11.6)                                              | 1                       |
|                                                                                       |               | 2                                   | 284                          | 28 (9.9)                                               | 0.76 (0.43-1.36)        |
|                                                                                       |               | ≥3                                  | 261                          | 32 (12.3)                                              | 1.01 (0.54-2.10)        |
| Lieberman et al., <sup>52</sup> 2007                                                  | USA           | 0                                   | 298                          | 7 (2.3)                                                |                         |
|                                                                                       |               | 1 or 2                              | 617                          | 40 (6.5)                                               |                         |
|                                                                                       |               | 3 or 4                              | 145                          | 23 (15.9)                                              |                         |
|                                                                                       |               | 5-9                                 | 64                           | 11 (17.2)                                              |                         |
|                                                                                       |               | 10+                                 | 8                            | 1 (12.5)                                               |                         |
| Laiyemo et al., <sup>53</sup> 2008                                                    | USA           | 1                                   | 1,218                        | 66 (5.4)                                               |                         |
|                                                                                       |               | 2                                   | 405                          | 31 (7.7)                                               |                         |
|                                                                                       |               | ≥3                                  | 282                          | 28 (9.9)                                               |                         |
| Outcome measures using HR                                                             |               |                                     |                              |                                                        | Adjusted HR (95% CI)    |
| Bertario et al., <sup>10</sup> 2003                                                   | Italy         | 1                                   | 736                          | 7 (1)                                                  | 1                       |
|                                                                                       |               | ≥2                                  | 350                          | 7 (2)                                                  | 2.0 (0.7-5.8)           |
| Huang et al., <sup>35</sup> 2010                                                      | China         | 1                                   | 808                          | 37 (4.6)                                               | 1                       |
|                                                                                       |               | 2                                   | 244                          | 15 (6.1)                                               | 1.92 (1.04-3.54)        |
|                                                                                       |               | ≥3                                  | 304                          | 70 (23)                                                | 1.87 (1.12-3.10)        |
| Chung et al., <sup>36</sup> 2011                                                      | Korea         | 1 or 2                              |                              |                                                        | 1                       |
|                                                                                       |               | ≥3                                  |                              |                                                        | 3.06 (1.51-6.57)        |

OR, odds ratio; RR, relative risk; CI, confidence interval; HR, hazard ratio.

**Supplementary Table 3.** The Size of Colorectal Adenoma as a Risk Factor of Advanced Neoplasia

| Study, yr                                                                             | Country       | Adenoma size measurement                                                                   | Size of index adenoma, mm | Enrolled total patients, No. | Patients with metachronous advanced neoplasia | Adjusted OR/RR (95% CI) |
|---------------------------------------------------------------------------------------|---------------|--------------------------------------------------------------------------------------------|---------------------------|------------------------------|-----------------------------------------------|-------------------------|
| Jorgensen et al., <sup>9</sup> 1995                                                   | Denmark       | Pathologic evaluation                                                                      | ≤5                        |                              |                                               | 1                       |
|                                                                                       |               |                                                                                            | 6-10                      |                              |                                               | 1.2 (0.5-2.9)           |
|                                                                                       |               |                                                                                            | >10                       |                              |                                               | 1.2 (0.5-2.9)           |
| Noshirwani et al., <sup>31</sup> 2000                                                 | USA           | Endoscopic estimation                                                                      | <10                       |                              |                                               | 1                       |
|                                                                                       |               |                                                                                            | ≥10                       |                              |                                               | 3.68 (2.01-6.76)        |
| Nusko et al., <sup>32</sup> 2002                                                      | Germany       | Small adenomas (≤5 mm): endoscopic estimation/<br>larger adenoma:<br>pathologic evaluation | ≤10                       |                              |                                               | 1                       |
|                                                                                       |               |                                                                                            | >10                       |                              |                                               | 1.81 (1.42-2.31)        |
|                                                                                       |               |                                                                                            | >10                       |                              |                                               | 1.81 (1.42-2.31)        |
| Bonithon-Kopp et al., <sup>49</sup> 2004                                              | Europe        | Endoscopic estimation                                                                      | <10                       | 243                          | 19 (7.8)                                      | 1                       |
|                                                                                       |               |                                                                                            | ≥10                       | 309                          | 22 (7.1)                                      | 1.06 (0.54-2.06)        |
| Martinez et al., <sup>30</sup> 2009                                                   | North America |                                                                                            | <5                        | 2,540                        | 209 (8.2)                                     | 1                       |
|                                                                                       |               |                                                                                            | 5-10                      | 3,115                        | 287 (9.2)                                     | 1.17 (0.95-1.42)        |
|                                                                                       |               |                                                                                            | 10-20                     | 2,487                        | 415 (16.7)                                    | 2.27 (1.84-2.78)        |
|                                                                                       |               |                                                                                            | ≥20                       | 672                          | 138 (20.5)                                    | 2.99 (2.24-4.00)        |
| Pinsky et al., <sup>34</sup> 2009                                                     | USA           |                                                                                            | <10                       |                              |                                               | 1                       |
|                                                                                       |               |                                                                                            | ≥10 TA                    |                              |                                               | 1.5 (1.03-2.3)          |
| Below studies were included in pooled analysis (Martinez et al., <sup>30</sup> 2009). |               |                                                                                            |                           |                              |                                               |                         |
| Winawer et al., 1993                                                                  | USA           | Endoscopic estimation                                                                      | ≤5                        | 228                          | 3 (1.3)                                       | 1                       |
|                                                                                       |               |                                                                                            | 6-10                      | 354                          | 8 (2.3)                                       | 1.3 (0.3-5.2)           |
|                                                                                       |               |                                                                                            | >10                       | 356                          | 17 (4.8)                                      | 2.2 (0.6-7.8)           |
| van Stolk et al., <sup>50</sup> 1998                                                  | USA           | Endoscopic estimation                                                                      | <10                       | 258                          | 11 (4.3)                                      | 1                       |
|                                                                                       |               |                                                                                            | ≥10                       | 219                          | 7 (3.2)                                       | 0.49 (0.16-1.51)        |
| Martinez et al., <sup>51</sup> 2001                                                   | USA (Arizona) | Endoscopic estimation                                                                      | <5                        | 395                          | 36 (9.1)                                      | 1                       |
|                                                                                       |               |                                                                                            | 6-10                      | 543                          | 52 (9.6)                                      | 0.88 (0.52-2.14)        |
|                                                                                       |               |                                                                                            | 10                        | 349                          | 58 (16.6)                                     | 2.27 (1.25-4.14)        |
| Lieberman et al., <sup>52</sup> 2007                                                  | USA           | Endoscopic estimation                                                                      | No adenoma                | 298                          | 7 (2.3)                                       | 1                       |
|                                                                                       |               |                                                                                            | <10                       | 622                          | 38 (6.1)                                      | 2.56 (1.16-5.67)        |
|                                                                                       |               |                                                                                            | ≥10                       | 123                          | 19 (15.5)                                     | 6.40 (2.74-14.94)       |
| Laiyemo et al., <sup>53</sup> 2008                                                    | USA           | Endoscopic estimation                                                                      | <10                       | 1,204                        | 67 (5.6)                                      |                         |
|                                                                                       |               |                                                                                            | ≥10                       | 560                          | 44 (7.9)                                      |                         |
| Outcome measures using HR                                                             |               |                                                                                            |                           |                              |                                               | Adjusted HR (95% CI)    |
| Bertario et al., <sup>10</sup> 2003                                                   | Italy         | Pathologic evaluation                                                                      | ≤10                       | 700                          | 6 (0.9)                                       | 1                       |
|                                                                                       |               |                                                                                            | 10-20                     | 256                          | 4 (1.6)                                       | 1.9 (0.5-6.6)           |
|                                                                                       |               |                                                                                            | >20                       | 107                          | 4 (3.7)                                       | 4.0 (1.1-14.4)          |
| Huang et al., <sup>35</sup> 2010                                                      | China         |                                                                                            | ≤10                       |                              |                                               | 1                       |
|                                                                                       |               |                                                                                            | 10-19                     |                              |                                               | 1.25 (0.60-2.62)        |
|                                                                                       |               |                                                                                            | ≥20                       |                              |                                               | 2.35 (1.09-5.06)        |
| Chung et al., <sup>36</sup> 2011                                                      | Korea         | Endoscopic estimation or pathologic evaluation                                             | <10                       |                              |                                               | 1                       |
|                                                                                       |               |                                                                                            | ≥10                       |                              |                                               | 3.02 (1.80-5.06)        |

OR, odds ratio; RR, relative risk; CI, confidence interval; TA, tubular adenoma; HR, hazard ratio.

**Supplementary Table 4.** The Villous/Tubulovillous Adenoma as a Risk Factor for Advanced Neoplasia

| Study, yr                                                                             | Country       | Definition of tubulovillous or villous adenoma                                             | Histology of adenoma at index polyp                                            | Enrolled total patients, No. | Patients with metachronous advanced neoplasia, No. (%) | Adjusted OR/RR (95% CI)                    |
|---------------------------------------------------------------------------------------|---------------|--------------------------------------------------------------------------------------------|--------------------------------------------------------------------------------|------------------------------|--------------------------------------------------------|--------------------------------------------|
| Jorgensen et al., <sup>9</sup> 1995                                                   | Denmark       | Tubulovillous adenoma: $\geq 20\%$ composed of villous structure                           | Tubular<br>Tubulovillous                                                       |                              |                                                        | 1<br>1.2 (0.6-2.7)                         |
| Noshirwani et al., <sup>31</sup> 2000                                                 | USA           |                                                                                            | Tubular<br>Others                                                              |                              |                                                        | 1<br>1.37 (0.72-2.62)                      |
| Bonithon-Kopp et al., <sup>49</sup> 2004                                              | Europe        | According to a standard protocol                                                           | Tubular<br>Tubulovillous/Villous                                               | 455<br>97                    | 31 (6.8)<br>10 (10.3)                                  | 1<br>1.67 (0.76-3.67)                      |
| Martinez et al., <sup>30</sup> 2009                                                   | North America | Tubulovillous adenoma: 26-75% composed of villous component/villous adenoma: >75% composed | Tubular<br>Tubulovillous/Villous                                               | 7,268<br>1,899               | 749 (10.3)<br>336 (17.7)                               | 1<br>1.28 (1.07-1.52)                      |
| Pinsky et al., <sup>34</sup> 2009                                                     | USA           |                                                                                            | Tubular<br>Tubulovillous/Villous                                               |                              |                                                        | 1<br>2.2 (1.5-3.1)                         |
| Below studies were included in pooled analysis (Martinez et al., <sup>30</sup> 2009). |               |                                                                                            |                                                                                |                              |                                                        |                                            |
| Martinez et al., <sup>51</sup> 2001                                                   | USA (Arizona) | Tubulovillous adenoma: 26-75% composed of villous component/villous adenoma: >75% composed | Tubular<br>Tubulovillous<br>Villous                                            | 842<br>317<br>59             | 92 (10.9)<br>41 (12.9)<br>9 (15.3)                     | 1<br>1.10 (0.64-1.87)<br>0.41 (0.15-1.13)  |
| Lieberman et al., <sup>52</sup> 2007                                                  | USA           | Adenoma with villous histology: $\geq 25\%$ composed of villous histology                  | Unspecified/Incipient<br>Control (no neoplasia) adenoma with villous histology | 69<br>298<br>81              | 4 (5.8)<br>7 (2.3)<br>13 (16.1)                        | 0.47 (0.09-2.62)<br>1<br>6.05 (2.48-14.71) |
| Outcome measures using HR                                                             |               |                                                                                            |                                                                                |                              |                                                        | Adjusted HR (95% CI)                       |
| Bertario et al., <sup>10</sup> 2003                                                   | Italy         | According to WHO Classification                                                            | Tubular<br>Tubulovillous<br>Villous                                            | 772<br>205<br>80             | 10 (1.3)<br>3 (1.5)<br>1 (1.3)                         | 1<br>1.5 (0.4-5.6)<br>1.2 (0.2-10.2)       |
| Huang et al., <sup>35</sup> 2010                                                      | China         | According to WHO Classification                                                            | Tubular<br>Tubulovillous/Villous                                               | 961<br>395                   | 20 (2.1)<br>103 (26.1)                                 | 1<br>2.57 (1.24-5.32)                      |
| Chung et al., <sup>36</sup> 2011                                                      | Korea         | According to WHO Classification                                                            | Tubular<br>Tubulovillous/Villous                                               |                              |                                                        | 1<br>1.48 (0.74-2.95)                      |

OR, odds ratio; RR, relative risk; CI, confidence interval; HR, hazard ratio; WHO, World Health Organization.

**Supplementary Table 5.** The High Grade Dysplasia as a Risk Factor for Advanced Neoplasia

| Study, yr                                                                         | Country       | Classification of dysplasia                                                                                     | Degree of atypia of index polyp | Enrolled total patients, No. | Patients with metachronous advanced neoplasia, No. (%) | Adjusted OR/RR (95% CI) |
|-----------------------------------------------------------------------------------|---------------|-----------------------------------------------------------------------------------------------------------------|---------------------------------|------------------------------|--------------------------------------------------------|-------------------------|
| Jorgensen et al., <sup>9</sup> 1995                                               | Denmark       | According to Konishi & Morson (J Clin Pathol 1982;35:830-41)                                                    | Mild                            |                              |                                                        | 1                       |
|                                                                                   |               |                                                                                                                 | Moderate                        |                              |                                                        | 1.0 (0.4-2.2)           |
|                                                                                   |               |                                                                                                                 | Severe                          |                              |                                                        | 2.1 (0.6-7.1)           |
| Bonithon-Kopp et al., <sup>49</sup> 2004                                          | Europe        | According to a standard protocol                                                                                | Mild                            | 308                          | 17 (5.5)                                               | 1                       |
|                                                                                   |               |                                                                                                                 | Moderate/Severe                 | 244                          | 24 (9.8)                                               | 1.86 (0.96-3.64)        |
| Martinez et al., <sup>30</sup> 2009                                               | North America |                                                                                                                 | Low grade dysplasia             | 6,485                        | 719 (11.1)                                             | 1                       |
|                                                                                   |               |                                                                                                                 | High grade dysplasia            | 683                          | 118 (17.3)                                             | 1.05 (0.81-1.35)        |
| Below Study was included in pooled analysis (Martinez et al. <sup>30</sup> 2009). |               |                                                                                                                 |                                 |                              |                                                        |                         |
| Lieberman et al., <sup>52</sup> 2007                                              | USA           | Patients with intramucosal carcinoma or carcinoma <i>in situ</i> were classified as having high-grade dysplasia | No neoplasia                    | 298                          | 7 (2.3)                                                | 1                       |
|                                                                                   |               |                                                                                                                 | High grade dysplasia            | 46                           | 8 (17.4)                                               | 6.87 (2.61-18.07)       |
|                                                                                   |               |                                                                                                                 | CRC                             | 23                           | 8 (34.8)                                               | 13.56 (5.54-33.18)      |
| Outcome measures using HR                                                         |               |                                                                                                                 |                                 |                              |                                                        | Adjusted HR (95% CI)    |
| Bertario et al., <sup>10</sup> 2003                                               | Italy         | According to WHO classification                                                                                 | Low/Moderate                    | 1,050                        | 11 (1.0)                                               | 1                       |
|                                                                                   |               |                                                                                                                 | Severe                          | 36                           | 1 (2.8)                                                | 3.3 (0.7-15.5)          |
| Huang et al., <sup>35</sup> 2010                                                  | China         | According to WHO classification                                                                                 | Low grade dysplasia             | 1,150                        | 66 (5.7)                                               | 1                       |
|                                                                                   |               |                                                                                                                 | High grade dysplasia            | 206                          | 57 (27.7)                                              | 1.61 (1.07-2.42)        |

OR, odds ratio; RR, relative risk; CI, confidence interval; CRC, colorectal cancer; HR, hazard ratio; WHO, World Health Organization classification.

**Supplementary Table 6.** The Large Serrated Polyp at Index Colonoscopy as a Risk Factor for Advanced Neoplasia

| Study (yr)                         | Country | Definition of large serrated adenoma                                                                | Large serrated adenoma | Enrolled total patients, No. | Patients with metachronous advanced neoplasia, No. (%) | Adjusted OR/RR (95% CI) |
|------------------------------------|---------|-----------------------------------------------------------------------------------------------------|------------------------|------------------------------|--------------------------------------------------------|-------------------------|
| Hiraoka et al., <sup>68</sup> 2010 | Japan   | Large serrated polyps: serrated polyps $\geq 10$ mm                                                 | No                     | 10,059                       | 1,511 (15.0)                                           | 1                       |
|                                    |         |                                                                                                     | Yes                    | 140                          | 62 (44.3)                                              | 4.01 (2.83-5.69)        |
| Li et al., <sup>70</sup> 2009      | USA     | Large serrated polyps: serrated polyps $\geq 10$ mm                                                 | No                     | 4,710                        | 467 (9.9)                                              | 1                       |
|                                    |         |                                                                                                     | Yes                    | 109                          | 27 (5.8)                                               | 3.24 (2.05-5.13)        |
| Schreiner, 2010                    | USA     | Large non-dysplastic serrated polyp: hyperplastic polyps and sessile serrated adenomas $\geq 10$ mm | No                     | 3,121                        |                                                        | 1                       |
|                                    |         |                                                                                                     | Yes                    | 44                           |                                                        | 1.90 (1.33-2.70)        |

Definition of serrated polyps: hyperplastic polyps, sessile serrated adenomas, and traditional serrated adenomas.  
OR, odds ratio; RR, relative risk; CI, confidence interval.



**Supplementary Table 7.** The Location of Index Polyp as a Risk Factor for Advanced Neoplasia

| Study, yr                                                                          | Country       | Definition of proximal colon | Location of index adenoma | Enrolled total patients, No. | Patients with metachronous advanced neoplasia, No. (%) | Adjusted OR/RR (95% CI) |
|------------------------------------------------------------------------------------|---------------|------------------------------|---------------------------|------------------------------|--------------------------------------------------------|-------------------------|
| Bonithon-Kopp et al., <sup>49</sup> 2004                                           | Europe        | Cecum-transverse colon       | No proximal location      | 438                          | 23 (5.3)                                               | 1                       |
|                                                                                    |               |                              | Proximal location         | 114                          | 18 (15.8)                                              | 2.63 (1.31-5.3)         |
| Martinez et al., <sup>30</sup> 2009                                                | North America | Cecum-splenic flexure        | Distal                    | 4,434                        | 395 (8.9)                                              | 1                       |
|                                                                                    |               |                              | Proximal only             | 2,620                        | 330 (12.6)                                             | Any proximal:           |
|                                                                                    |               |                              | Both                      | 1,754                        | 325 (18.5)                                             | 1.68 (1.43-1.98)        |
| Pinsky et al., <sup>34</sup> 2009                                                  | USA           | Not mentioned                | Distal colon only         |                              |                                                        | 1                       |
|                                                                                    |               |                              | Proximal colon only       |                              |                                                        | 1.8 (1.1-2.7)           |
| Below study was included in pooled analysis (Martinez et al., <sup>30</sup> 2009). |               |                              |                           |                              |                                                        |                         |
| Martinez et al., <sup>51</sup> 2001                                                | USA           | Cecum-transverse colon       | Distal colon              | 701                          | 68 (9.7)                                               | 1                       |
|                                                                                    |               |                              | Proximal colon            | 349                          | 44 (12.6)                                              | 1.65 (1.02-2.67)        |
|                                                                                    |               |                              | Both                      | 234                          | 33 (14.1)                                              | 2.69 (1.34-5.42)        |
| Outcome measures using HR                                                          |               |                              |                           |                              |                                                        | Adjusted HR (95% CI)    |
| Huang et al., <sup>35</sup> 2010                                                   | China         | Cecum-splenic flexure        | Any proximal              | 562                          | 77 (13.7)                                              | 1                       |
|                                                                                    |               |                              | Distal only               | 794                          | 46 (5.8)                                               | 0.77 (0.48-1.22)        |

OR, odds ratio; RR, relative risk; CI, confidence interval; HR, hazard ratio.

**Supplementary Table 8.** Age as a Risk Factor for Advanced Neoplasia

| Study, yr                             | Country       | Age                          | Age at time of polypectomy, yr | Enrolled total patients, No. | Patients with metachronous advanced neoplasia, No. (%) | Adjusted OR/RR (95% CI) |
|---------------------------------------|---------------|------------------------------|--------------------------------|------------------------------|--------------------------------------------------------|-------------------------|
| Jorgensen et al., <sup>9</sup> 1995   | Denmark       | Range, 28-77                 | ≤60                            |                              |                                                        | 1                       |
|                                       |               |                              | >60                            |                              |                                                        | 1.5 (0.8-3.0)           |
| Noshirwani et al., <sup>31</sup> 2000 | USA           |                              | Per 10-yr increase             |                              |                                                        | 1.10 (0.82-1.45)        |
| Laiyemo et al., <sup>86</sup> 2009    | USA           | 65.3±9.6                     | ≤65                            |                              |                                                        | 1                       |
|                                       |               |                              | >65                            |                              |                                                        | 1.3 (0.7-2.5)           |
| Martinez et al., <sup>30</sup> 2009   | North America | Mean, 62.0 yr (range, 22-80) | <40                            | 154                          | 6 (3.9)                                                | 0.41 (0.18-0.94)        |
|                                       |               |                              | 40-49                          | 804                          | 52 (6.5)                                               | 0.67 (0.48-0.93)        |
|                                       |               |                              | 50-59                          | 2,397                        | 213 (8.9)                                              | 1                       |
|                                       |               |                              | 60-69                          | 3,676                        | 460 (12.5)                                             | 1.39 (1.16-1.68)        |
|                                       |               |                              | 70-79                          | 2,074                        | 328 (15.8)                                             | 1.72 (1.40-2.11)        |
|                                       |               |                              | ≥80                            | 62                           | 12 (19.4)                                              | 2.70 (1.31-5.57)        |
| Outcome measures using HR             |               |                              |                                |                              |                                                        | Adjusted HR (95% CI)    |
| Bertario et al., <sup>10</sup> 2003   | Italy         | Mean, 61 yr (range, 24-87)   | <60                            | 503                          | 5 (1.0)                                                | 1                       |
|                                       |               |                              | 60-69                          | 339                          | 5 (1.5)                                                | 2.1 (0.6-7.5)           |
|                                       |               |                              | ≥70                            | 244                          | 4 (1.6)                                                | 4.1 (1.0-16.0)          |
| Yamaji et al., <sup>87</sup> 2004     | Japan         | 48.1±9.4                     | <40                            | 154                          | 6 (3.9)                                                | 1                       |
|                                       |               |                              | 40-49                          | 804                          | 52 (6.5)                                               | 2.3 (0.7-7.6)           |
|                                       |               |                              | 50-59                          | 2,397                        | 213 (8.9)                                              | 3.6 (1.1-12)            |
|                                       |               |                              | ≥60                            | 62                           | 12 (19.4)                                              | 5.5 (1.6-19)            |
| Huang et al., <sup>35</sup> 2010      | China         | 52.4±12.5 (range, 20-84)     | <50                            | 554                          | 20 (3.6)                                               | 1                       |
|                                       |               |                              | 50-59                          | 393                          | 43 (10.9)                                              | 1.81 (1.05-3.12)        |
|                                       |               |                              | >60                            | 409                          | 60 (14.7)                                              | 4.81 (2.80-8.25)        |
| Chung et al., <sup>36</sup> 2011      | Korea         | 52.7±69.6 (range, 50-69)     | 50-59                          |                              |                                                        | 1                       |
|                                       |               |                              | 60-69                          |                              |                                                        | 1.51 (0.86-2.65)        |

OR, odds ratio; RR, relative risk; CI, confidence interval; HR, hazard ratio.

**Supplementary Table 9.** Gender as a Risk Factor for Advanced Neoplasia

| Study, yr                              | Country       | Gender | Enrolled total patients, No. | Patients with metachronous advanced neoplasia, No. (%) | Adjusted OR/RR (95% CI) |
|----------------------------------------|---------------|--------|------------------------------|--------------------------------------------------------|-------------------------|
| Jorgensen et al., <sup>9</sup><br>1995 | Denmark       | Female |                              |                                                        | 0.9 (0.4-1.7)           |
|                                        |               | Male   |                              |                                                        | 1                       |
| Noshirwani et al., <sup>31</sup> 2000  | USA           | Female |                              |                                                        | 1                       |
|                                        |               | Male   |                              |                                                        | 1.48 (0.74-2.93)        |
| Laiyemo et al., <sup>86</sup><br>2009  | USA           | Female |                              |                                                        | 1                       |
|                                        |               | Male   |                              |                                                        | 2.0 (0.9-4.6)           |
| Martinez et al., <sup>30</sup><br>2009 | North America | Female | 2,642                        | 267 (10.1)                                             | 1                       |
|                                        |               | Male   | 6,525                        | 815 (12.5)                                             | 1.40 (1.19-1.65)        |
| Pinsky et al., <sup>34</sup><br>2009   | USA           | Female |                              |                                                        | 1                       |
|                                        |               | Male   |                              |                                                        | 1.2 (0.9-1.8)           |
| Outcome measures using HR              |               |        |                              |                                                        | Adjusted HR (95% CI)    |
| Bertario et al., <sup>10</sup><br>2003 | Italy         | Female | 487                          | 2 (0.4)                                                | 1                       |
|                                        |               | Male   | 599                          | 12 (2.0)                                               | 6.5 (1.4-29.9)          |
| Yamaji et al., <sup>87</sup><br>2004   | Japan         | Female |                              |                                                        | 1                       |
|                                        |               | Male   |                              |                                                        | 0.9 (0.5-1.5)           |
| Huang et al., <sup>35</sup><br>2010    | China         | Female | 493                          | 18 (3.7)                                               | 1                       |
|                                        |               | Male   | 863                          | 105 (12.2)                                             | 2.11 (1.27-3.53)        |
| Chung et al., <sup>36</sup><br>2011    | Korea         | Female |                              |                                                        | 1                       |
|                                        |               | Male   |                              |                                                        | 1.00 (0.57-1.77)        |

OR, odds ratio; RR, relative risk; CI, confidence interval; HR, hazard ratio.

**Supplementary Table 10.** The Family History of CRCs as a Risk Factor for Advanced Neoplasia

| Study, yr                           | Country       | Definition of positive family history                            | Family history of CRC | Enrolled total patients, No. | Patients with metachronous advanced neoplasia, No. (%) | Adjusted OR/RR (95% CI) |
|-------------------------------------|---------------|------------------------------------------------------------------|-----------------------|------------------------------|--------------------------------------------------------|-------------------------|
| Nusko et al., <sup>32</sup> 2002    | Germany       | Parental history of CRC                                          | No<br>Yes             |                              |                                                        | 1<br>2.32 (1.77-3.04)   |
| Laiyemo et al., <sup>86</sup> 2009  | USA           | CRC in a first-degree relative                                   | No<br>Yes             |                              |                                                        | 1<br>1.0 (0.5-2.0)      |
| Martinez et al., <sup>30</sup> 2009 | North America |                                                                  | No<br>Yes             | 6,547<br>2,089               | 759 (11.6)<br>255 (12.2)                               | 1<br>1.17 (0.99-1.38)   |
| Outcome measures using HR           |               |                                                                  |                       |                              |                                                        | Adjusted HR (95% CI)    |
| Bertario et al., <sup>10</sup> 2003 | Italy         | CRC in a first-degree relative                                   | No<br>Yes             | 787<br>299                   | 10 (1.3)<br>4 (1.3)                                    | 1<br>1.3 (0.4-4.1)      |
| Chung et al., <sup>36</sup> 2011    | Korea         | At least one first-degree relative with CRC diagnosed at any age | No<br>Yes             |                              |                                                        | 1<br>1.14 (0.48-2.76)   |

OR, odds ratio; RR, relative risk; CI, confidence interval; HR, hazard ratio; CRC, colorectal cancer.

**Supplementary Table 11.** Smoking as a Risk factor for Advanced Neoplasia

| Study, yr                           | Country       | Smoking status             | Enrolled total patients, No. | Patients with metachronous advanced neoplasia, No. (%) | Adjusted OR/RR (95% CI)                   |
|-------------------------------------|---------------|----------------------------|------------------------------|--------------------------------------------------------|-------------------------------------------|
| Martinez et al., <sup>30</sup> 2009 | North America | Never<br>Former<br>Current | 2,805<br>4,081<br>1,299      | 325 (11.6)<br>531 (13.0)<br>156 (12.0)                 | 1<br>1.08 (0.92-1.27)<br>1.13 (0.90-1.42) |
| Outcome measures using HR           |               |                            |                              |                                                        | Adjusted HR (95% CI)                      |
| Chung et al., <sup>36</sup> 2011    | Korea         | Never<br>Current smoking   |                              |                                                        | 1<br>1.55 (0.97-2.50)                     |

OR, odds ratio; RR, relative risk; CI, confidence interval; HR, hazard ratio.

**Supplementary Table 12.** Obesity as a Risk Factor for Advanced Neoplasia

| Study, yr                           | Country       | Obesity                         | Enrolled total patients, No. | Patients with metachronous advanced neoplasia, No. (%) | Adjusted OR/RR (95% CI) |                                           |
|-------------------------------------|---------------|---------------------------------|------------------------------|--------------------------------------------------------|-------------------------|-------------------------------------------|
| Martinez et al., <sup>30</sup> 2009 | North America | BMI <25<br>BMI 25-30<br>BMI ≥30 | 2,332<br>3,771<br>2,110      | 285<br>463<br>262                                      | 12.2<br>12.3<br>12.4    | 1<br>1.00 (0.84-1.19)<br>1.13 (0.93-1.38) |
| Outcome measures using HR           |               |                                 |                              |                                                        | Adjusted HR (95% CI)    |                                           |
| Chung et al., <sup>36</sup> 2011    | Korea         | BMI <25<br>BMI ≥25              |                              |                                                        | 1<br>1.10 (0.74-1.35)   |                                           |

OR, odds ratio; RR, relative risk; CI, confidence interval; BMI, body mass index; HR, hazard ratio.
